# Supplementary material for: Three-Dimensional Echocardiography-Derived Myocardial Mechanistic Insights into Obstructive Hypertrophic Cardiomyopathy with Moderate Septal Hypertrophy
Source: Research Square preprint supplement (doi:10.21203/rs.3.rs-8315722/v1), 2026-01-12
Supplement: Supplementary file 1 [file 7f7049244ef9835de4d586a3.docx]

| **3DE Variables** | **ICC (95% CI)** |
| --- | --- |
| GLS | 0.958[0.898,0.983) |
| GCS | 0.984[0.96,0.994) |
| GAS | 0.963[0.906,0.985) |
| GRS | 0.963[0.908,0.985) |
| Twist | 0.919[0.808,0.967) |
| Torsion | 0.887[0.738,0.954) |

**Table S2. ICC of 3DE LV metrics of intraobserver measurements.**

**Footnote**: The intraclass correlation coefficients (ICC) with 95% confidence intervals (95%CI) for intraobserver measurements of various three-dimensional echocardiography (3DE) left ventricular (LV) mechanics variables are displayed. The 3DE variates include GLS, GCS, GAS, GRS, twist, and torsion. ICC values close to 1 indicate a high level of agreement among the repeated measurements made by the observer, suggesting good reproducibility of these 3DE LV metrics. 3DE, three-dimensional echocardiography; LV, left ventricular; ICC, intraclass correlation coefficient; GLS, global longitudinal strain; GCS, global circumferential strain; GAS, global area strain; GRS, global radial strain.
