# Supplementary material for: Three-Dimensional Echocardiography-Derived Myocardial Mechanistic Insights into Obstructive Hypertrophic Cardiomyopathy with Moderate Septal Hypertrophy
Source: Research Square preprint supplement (doi:10.21203/rs.3.rs-8315722/v1), 2026-01-12
Supplement: Supplementary file 2 [file d992079d1654890bb8ad2988.docx]

|  |  | **HCM with Moderate Hypertrophy** | | | |  | **P values of HCM**  **vs Control** | | | |
| --- | --- | --- | --- | --- | --- | --- | --- | --- | --- | --- |
|  | **Healthy Control**  **(n=32)** | **All**  **（n=216）** | **Nonobstructive**  **（n=38）** | **Provokable**  **LVOTO（n=63）** | **Resting**  **LVOTO（n=115）** |  | **All** | **No LVOTO** | **Provoked LVOTO** | **Resting LVOTO** |
| **Male, n/%** | 23 (71.43%) | 130(60.2%) | 29 (76.32%) | 40 (63.49%) | 61 (53.04%) |  | 0.250 | 0.506 | 0.549 | 0.083 |
| **Age, year** | 52 (45,58) | 54(45,62) | 51.5 (37.8,61) | 57 (46,63) | 56 (45.5,65) |  | 0.063 | >0.999 | 0.123 | 0.079 |
| **BSA, m2/kg** | 1.72±0.16 | 1.74±0.19 | 1.73±0.24 | 1.75±0.2 | 1.75±0.18 |  | 0.519 | >0.999 | 0.778 | 0.654 |
| **SBP, mmHg** | 125.5 (119,130.5) | 128 (114.75,142) | 136.5 (110.5,148) | 132 (120,146) | 125 (112.5,136.5) |  | 0.243 | 0.829 | 0.228 | >0.999 |
| **DBP, mmHg** | 78.46±7.67 | 76.22±11.2 | 77.89±13.01 | 78.57±11.73 | 74.38±9.97 |  | 0.178 | >0.999 | >0.999 | 0.132 |
| **LVEDVi, ml/m2** | 49.0 (42.3,56.1) | 49.8(44,58.3) | 47.3 (38.6,51.4) | 50.2 (43.9,58.2) | 51.5 (44.94,59.9) |  | 0.117 | >0.999 | >0.999 | 0.583 |
| **LVESVi, ml/m2** | 18.23(16.1,20.5) | 16.04(13.1,20.1) | 18.21 (14.7,22.9) | 15.91 (12.4,20.1) | 15.12 (12.8,18.8) |  | 0.085 | >0.999 | 0.463 | 0.176 |
| **LVEF, %** | 62 (60,64.3) | 67(59.5,73.8) | 59.0 (52.7,62.5) | 66.4 (61.1,73.5) | 70.2 (63.0,76.1) |  | **0.009*** | 0.813 | **0.093*** | **<0.001*** |
| **3DE strain mechanics** | | | | | | | | | | |
| **GLS, -%** | 16 (14,17) | 14.39(11.98,16.7) | 12.5 (10,13.25) | 15 (13,17) | 15 (12,17) |  | 0.055 | **<0.001*** | >0.999 | >0.999 |
| **GCS, -%** | 15.5 (14,17) | 18.6(16.1,21,1) | 17 (14,18.25) | 18 (15.25,21) | 19 (17,21) |  | **<0.001*** | >0.999 | **0.013*** | **<0.001*** |
| **GAS, -%** | 28 (25,29.3) | 28.8(24.6,32.3) | 25 (22,29) | 29 (25,32.8) | 30 (26,32) |  | 0.341 | 0.939 | >0.999 | 0.604 |
| **GRS, %** | 42 (38.5,46.3) | 46.6(37.2,53.5) | 36.5 (32,46.5) | 48 (38,54) | 48 (40,54.5) |  | 0.085 | >0.999 | 0.493 | 0.100 |
| **Peak twist, °** | 6.15(4.8,10.3) | 12.4(6.6,17.3) | 6.25 (3.1,10.4) | 13.2 (7.05,17.4) | 13.7 (8.35,19.35) |  | **<0.001*** | >0.999 | **<0.001*** | **<0.001*** |
| **Peak torsion, °/cm** | 1.42 (1.1,1.93) | 2.50±1.24 | 1.55 (0.88,2.22) | 2.45 (1.5,3.08) | 2.7 (2.05,3.6) |  | **<0.001*** | 0.330 | **<0.001*** | **<0.001*** |

**Table S1. Baseline and 3DE-derived Strain Components of HCM Subgroups Compared with Health Control**

**Footnote:** *indicates statistic difference is significantly(p＜0.05). Data are presented as mean ± standard deviation or median (interquartile range) for continuous variables and number (percentage) for categorical variables. Comparisons among groups were performed using one-way analysis of variance (ANOVA) or the Kruskal–Wallis test for continuous variables, and the chi-square test for categorical variables. BSA: Body Surface Area, LVEDVi: Left Ventricular End-Diastolic Volume Index, LVESVi: Left Ventricular End-Systolic Volume Index, LVEF: Left Ventricular Ejection Fraction, 3DE: Three-Dimensional Echocardiographic, GLS: Global Longitudinal Strain, GCS: Global Circumferential Strain, GAS: Global Area
